# Supplementary material for: Role of Baseline Gut Microbiota on Response to Fiber Intervention in Individuals with Irritable Bowel Syndrome
Source: MDPI journal article supplement (doi:10.3390/nu15224786), 2023-11-15
Supplement: s1 [file s1]

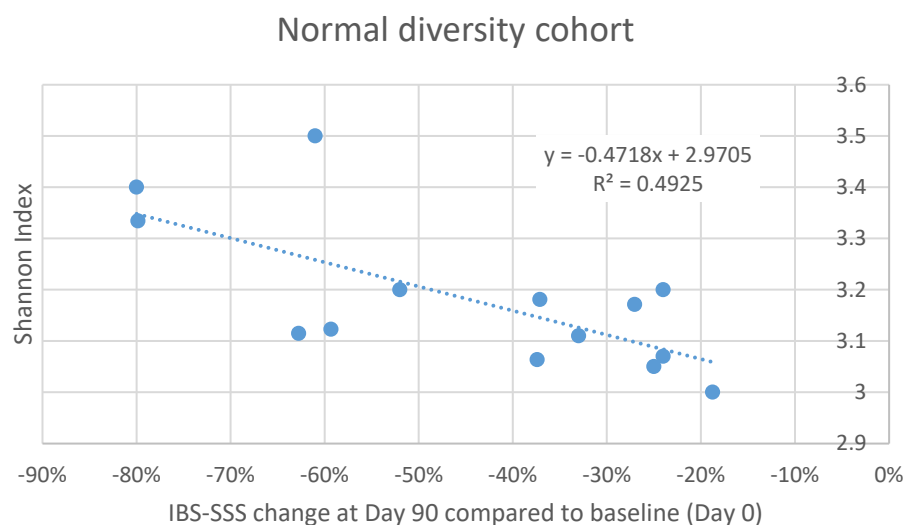

**Figure S1.** Correlation between microbiota diversity (Shannon Index) and percentage change to IBS symptom severity score in the normal baseline microbiota diversity cohort.

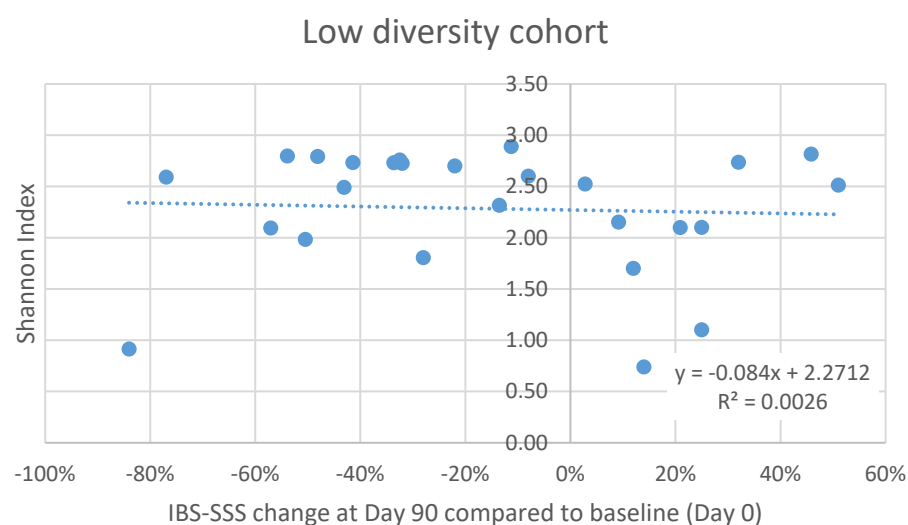

**Figure S2.** Correlation between microbiota diversity (Shannon Index) and percentage change to IBS symptom severity score in the low baseline microbiota diversity cohort.

**Table S1.** Differential microbes between group responsive to PHGG and not responsive to PHGG at Day 30 of intervention.

| Phylum        | Bacteria              | Responsive to PHGG<br>(% ±SD) | No Response to PHGG<br>(% ±SD) | <i>p</i> Value * | FDR    | LDA<br>Score |
|---------------|-----------------------|-------------------------------|--------------------------------|------------------|--------|--------------|
| Firmicutes    | <i>Oscillospira</i>   | 5.86 ± 4.71                   | 1.47 ± 1.02                    | <0.001           | 0.001  | 5.83         |
| Bacteroidetes | <i>Odoribacter</i>    | 2.32 ± 2.76                   | 0.11 ± 0.10                    | <0.001           | 0.004  | 5.12         |
| Firmicutes    | <i>F. prausnitzii</i> | 7.23 ± 5.76                   | 17.71 ± 14.83                  | 0.0033           | 0.0351 | -5.82        |
| Bacteroidetes | <i>P. copri</i>       | 0.07 ± 0.12                   | 14.02 ± 27.33                  | 0.0035           | 0.0452 | -5.64        |
| Bacteroidetes | <i>Prevotella</i>     | 0.08 ± 0.20                   | 15.83 ± 26.62                  | 0.0035           | 0.0440 | -5.93        |
